# Supplementary material for: Complete reconstruction of the crystalline lens shape from OCT images acquired with off-axis viewing
Source: Research Square preprint supplement (doi:10.21203/rs.3.rs-7957290/v1), 2025-12-04
Supplement: Supplementary file 1 [file 295ad942f9a6550aec5cd30e.docx]

**Supplementary Figure S1.** Segmentation examples of B-scans for 3 different incidence angles (Subject #1, OS). (A) Normal incidence segmentation, B-scan # 27; (B) Nasal (30 degrees) incidence segmentation, B-scan # 60; (C) Temporal (45 degrees) incidence segmentation, B-scan # 8. Segmentation examples in (A) and (B) were performed with the automatic segmentation algorithm; (C) shows the points clicked manually with the manual algorithm. The blue color indicates anterior cornea surface; red, posterior cornea surface; yellow, anterior lens surface; purple, posterior lens surface; and green indicates the iris.

**Supplementary Figure S2.** Illustration of the optical distortion correction process. A) Normal incidence. Black: Uncorrected surfaces. Green: Corresponding corrected surfaces, OS. B) Temporal 30 degrees incidence before (left) and after optical distortion correction (right). Blue: anterior cornea surface; red: posterior cornea surface; yellow: anterior lens surface; purple: posterior lens surface; green: iris. Examples are for Subject #1 (OS).

**Supplementary Video S3.** Registration of the eight 3-D models from the measurements at different incidence angles.

**Supplementary Video S4**. Combination of data for eight incidences after the registration process.

**Supplementary Figure S5.** View of the central part (within the pupil) of the posterior surface of the crystalline lens usually obtained in clinical measurements (black) and the full shape of the posterior lens obtained with the proposed method (different colors). (A) Upper view; (B) lateral view. Subject # 1.
